# Supplementary material for: Tuberculosis screening among persons with diabetes mellitus in Pune, India
Source: BMC Infect Dis. 2017 Jun 2;17:388. doi: 10.1186/s12879-017-2483-9 (PMC5457599; doi:10.1186/s12879-017-2483-9)
Supplement: Additional file 1: — Supplementary file: Raw data of the TB screening in patients with diabetes study. (XLSX 497 kb) [file 12879_2017_2483_MOESM1_ESM.xlsx]

## Sheet: Screening of patients with diab
External ID	Event	PBF_1	PBF_10	PBF_11	PBF_12	PBF_12_a	PBF_12_b	PBF_13	PBF_14	PBF_15	PBF_16	PBF_17	PBF_17_a	PBF_17_b	PBF_17_c	PBF_17_d	PBF_18	PBF_18_a	PBF_18_b	PBF_18_c	PBF_18_d	PBF_19	PBF_19_a	PBF_19_b	PBF_19_c	PBF_19_d	PBF_2	PBF_20	PBF_20_a	PBF_20_b	PBF_20_c	PBF_20_d	PBF_21	PBF_21_a	PBF_21_b	PBF_21_c	PBF_21_d	PBF_22	PBF_22_a	PBF_22_b	PBF_22_c	PBF_22_d	PBF_23	PBF_23_a	PBF_23_b	PBF_23_c	PBF_23_d	PBF_24	PBF_24_a
DM10001	Enrollment	Yes	Urban	Joint	4	4		Yes	No	Daily		No					No					No					60	No					No					No					No					No
DM10002	Enrollment	Yes	Urban	Nuclear	1	1	0	Yes	Yes	Daily	2014	No					No					No					49	No					No					No					No					No
DM10003	Enrollment	Yes	Rural	Nuclear	3	3		No	No	Other	1995	No					No					No					65	No					No					No					Yes	2011-06-01		5	ORAL	No
DM10004	Enrollment	Yes	Urban	Nuclear	8	4	4	No				Yes	2015-04-18				No					No					48	No					No					No					No					No
DM10005	Enrollment	Yes	Urban	Joint	3	3			No	Daily	2014	No					No					No					55	No					No					No					No					No
DM10006	Enrollment	Yes	Urban		6	4	2	Yes	No	Daily	2015	No					No					No					55	No					No					No					No					No
DM10007	Enrollment	Yes	Urban	Joint	5	3	2	No			2014	No					No					No					61	No					No					No					No					No
DM10008	Enrollment	Yes	Urban	Joint	5	3	2	No	No		1995	No					No					No					58	No					No					No					No					No
DM10009	Enrollment	Yes	Urban	Nuclear	5	4	1	No	No	Other	5	No					No					No					67	No					No					No					No					No
DM10010	Enrollment
DM10011	Enrollment	Yes	Urban	Nuclear	4	4		Yes	No	Daily	2006	No					No					No					63	No					No					No					No					No
DM10012	Enrollment	Yes	Urban	Joint	7	5	2	No		Other	2008	No					No					No					54	No					No					No					No					No
DM10013	Enrollment	Yes	Urban	Joint	6	5	1	Yes	No	Daily	2006	No					No					No					61	No					No					No					No					No
DM10014	Enrollment	Yes	Urban	Nuclear	1	1		Yes		Daily		No					No					No					63	No					No					No					No					No
DM10015	Enrollment	Yes	Urban	Nuclear	2	2		Yes	No	Daily	2005	No					No					No					68	No					No					No					No					No
DM10016	Enrollment	Yes	Urban	Nuclear	2	2		No			2013	No					No					No					60	No					No					No					No					No
DM10017	Enrollment	Yes	Rural	Joint	8	6	2	No	No		2015	No					No					No					58	No					No					No					No					No
DM10018	Enrollment
DM10019	Enrollment	Yes	Urban	Nuclear	1	1		Yes	No	Daily	2010	No					No					No					59	No					No					No					No					No
DM10021	Enrollment	Yes	Urban	Joint	7	4	3	Yes	No	Daily	2003	No					No					No					67	No					No					No					No					No
DM10022	Enrollment	Yes	Urban		1	1		Yes	No	Daily	1992	No					No					No					74	No					No					No					No					No
DM10023	Enrollment	Yes	Rural	Joint	7	5	2	Yes	Yes	Daily	2014	No					No					No					59	No					No					No					No					No
DM10024	Enrollment	Yes			6	5	1	No			2008	No					No					No					58	No					No					No					No					No
DM10025	Enrollment	Yes	Urban		4	4		No			2006	No					No					No					65	No					No					No					No					No
DM10026	Enrollment	Yes	Urban	Nuclear	6	6		No			2015	No					No					No					38	No					No					No					No					No
DM10027	Enrollment	Yes	Urban	Nuclear	3	3		Yes	No	Daily	2007	No					No					No					60	No					Yes	2015-03-10		200	SC	No					No					No
DM10028	Enrollment
DM10029	Enrollment	Yes	Urban	Joint	6	5	1	Yes	Yes	Daily	2002	No					No					No					41	No					No					No					Yes	2002-02-01				No
DM10030	Enrollment	Yes	Rural	Nuclear	1	1		No			2002	No					No					No					65	No					No					No					No					No
DM10031	Enrollment	Yes	Rural	Nuclear	1	1		Yes	No	Daily	2003	No					No					No					65	No					No					No					No					No
DM10032	Enrollment	Yes	Urban	Nuclear	2	2	0	Yes	No	Daily	2012	No					No					No					65	No					No					No					No					No
DM10033	Enrollment	Yes	Urban		7	6	1	Yes	No	Daily	2015	No					No					No					51	No					No					No					No					No
DM10034	Enrollment	Yes	Urban	Nuclear	2	2		Yes	No		2010	No					No					No					55	No					No					No					No					No
DM10035	Enrollment	Yes	Rural	Nuclear	3	3		No	No	Other	2011	No					No					No					70	No					No					No					Yes	2011-06-01			ORAL	No
DM10036	Enrollment	Yes	Urban	Nuclear	4	4		Yes	No	Daily	1988	No					No					No					65	No					No					No					No					No
DM10037	Enrollment	Yes	Rural	Nuclear	2	2		Yes	No	Daily	2012	No					No					No					27	No					No					No					No					No
DM10038	Enrollment	Yes	Urban	Nuclear	1	1		No	No	Other	2015	No					No					No					60	No					No					No					No					No
DM10039	Enrollment	Yes	Rural	Joint	9	5	4	Yes	No	Daily	2014	No					No					No					35	No					No					No					No					No
DM10040	Enrollment	Yes		Joint	11	9	2	Yes	No	Daily	2003	No					No					No					62	No					No					No					No					No
DM10041	Enrollment	Yes	Urban	Joint	6	4	2	Yes	No	Daily	2005	No					No					No					70	No					No					No					No					No
DM10042	Enrollment	Yes	Urban	Nuclear	2	2	0	Yes	No	Daily	2014	No					No					No					65	No					No					No					No					No
DM10043	Enrollment	Yes	Urban	Nuclear	5	5	0	Yes	Yes	Daily	2009	No					No					No					49	No					No					No					No					No
DM10044	Enrollment	Yes	Urban	Nuclear	7	4	3	Yes	No	Daily	2003	No					No					No					65	No					No					No					No					No
DM10045	Enrollment	Yes	Rural	Nuclear	6	6	0	Yes	No	Daily	2014	No					No					No					65	No					No					No					No					No
DM10047	Enrollment	Yes	Urban	Joint	8	6	2	Yes	No	Daily	2014	No					No					No					63	No					No					No					No					No
DM10048	Enrollment	Yes	Rural	Nuclear	2	2	0		No		2005	No					No					No					75	No					No					No					No					No
DM10049	Enrollment	Yes	Urban	Joint	8	6	2		No	Daily	2014	No					No					No					50	No					No					No					No					No
DM10050	Enrollment	Yes	Urban		8	7	1	No			2009	No					No					No					62	No					No					No					No					No
DM10051	Enrollment	Yes	Urban	Nuclear	4	2	2	No	No	Other		No					No					No					70	No					No					No					Yes	2011-01-01		5	ORAL	No
DM10052	Enrollment	Yes	Rural	Joint	5	5	0	No	No	Weekly (once in a week)	2013	No					No					No					67	No					No					No					Yes	2013-11-20		2	ORAL	No
DM10053	Enrollment	Yes	Urban	Joint	8	5	3	Yes	No	Daily		No					No					No					68	No					No					No					No					No
DM10054	Enrollment	Yes	Urban	Nuclear	8	8	0	No			2011	No					No					No					63	No					No					No					Yes	2012-08-10		1	ORAL	No
DM10055	Enrollment	Yes	Urban	Nuclear	5	3	2	No			2012	No					No					No					60	No					No					No					Yes	2013-03-05	2013-11-13	5	ORAL	No
DM10056	Enrollment	Yes	Rural	Nuclear	4	4	0	Yes	No	Daily	2005	No					No					No					50	No					No					No					No					No
DM10057	Enrollment	Yes	Rural	Nuclear	1	1	0	Yes	No	Daily	2011	No					No					No					36	No					No					No					No					No
DM10058	Enrollment	Yes	Rural	Nuclear	1	1	0	Yes	No	Daily	2009	No					No					No					39	No					No					No					No					No
dm10059	Enrollment	Yes	Urban	Joint	11	6	5	Yes	No	Daily	2004	No					No					No					61	No					No					No					Yes	2013-10-23		1	ORAL	No
DM10060	Enrollment	Yes	Urban	Joint	8	8	0	Yes	No	Weekly (once in a week)	2014	No					No					No					58	No					No					No					No					No
DM10062	Enrollment	Yes	Urban		2	2	0	Yes	No	Daily	2009	No					No					No					65	No					No					No					Yes	2009-11-06		2	ORAL	No
DM10063	Enrollment	Yes	Urban	Joint	9	7	2	Yes	No	Daily	2010	No					No					No					72	No					No					No					No					No
DM10064	Enrollment	Yes	Urban	Nuclear	5	5	0	No			2014	No					No					No					44	No					No					No					No					No
DM10065	Enrollment	Yes	Urban	Joint	4	4	0	Yes	No	Daily	2002	No					No					No					62	No					No					No					No					No
DM10066	Enrollment	Yes	Urban	Nuclear	4	4		Yes	No	Daily	2012	No					No					No					62	No					No					No					No					No
DM10067	Enrollment	Yes	Urban	Joint	8	4	4	Yes	No	Daily	2008	No					No					No					70	No					No					No					Yes	2009-03-20		1	ORAL	No
DM10068	Enrollment	Yes	Urban	Joint	6	4	2	Yes	No	Daily	2009	No					No					No					48	No					No					No					No					No
DM10069	Enrollment	Yes	Urban	Nuclear	5	3	2	Yes	No	Daily	2010	No					No					No					42	No					No					No					No					No
DM10070	Enrollment	Yes	Urban	Joint	6	4	2	Yes	Yes	Daily	2013	No					No					No					41	No					No					No					No					No
DM10071	Enrollment	Yes	Urban	Nuclear	4	4		Yes	No	Daily	2005	No					No					No					46	No					No					No					No					No
DM10072	Enrollment	Yes	Urban	Nuclear	3	3		No	No	Daily	2005	No					No					No					45	No					No					No					No					No
DM10073	Enrollment	Yes	Urban	Nuclear	5	2	3	Yes	Yes	Daily	2013	No					No					No					34	No					No					No					No					No
DM10074	Enrollment	Yes	Urban	Nuclear	3	3	0	Yes	No	Daily	2000	No					No					No					62	No					No					No					Yes	2000-01-01		5	ORAL	No
DM10075	Enrollment	Yes	Urban	Nuclear	6	2	4	Yes	No		1992	No					No					No					45	No					No					No					No					No
DM10076	Enrollment	Yes	Rural	Nuclear	3	3		No	No	Daily	2015	No					No					No					48	No					No					No					No					No
DM10077	Enrollment	Yes	Urban	Nuclear	4	4		Yes	No	Daily	2014	No					No					No					56	No					No					No					No					No
DM10078	Enrollment	Yes	Urban	Nuclear	5	4	1	Yes	No	Daily	2008	No					No					No					58	No					No					No					Yes	2010-09-19		1	ORAL	No
DM10079	Enrollment	Yes	Urban	Nuclear	3	3		No	No	Other	2003	No					No					No					58	No					No					No					No					No
DM10080	Enrollment	Yes	Urban	Nuclear	4	4		Yes	No	Daily	2012	No					No					No					42	No					No					No					No					No
DM10081	Enrollment	Yes	Urban	Joint	6	5	1	Yes	No	Daily	2010	No					No					No					87	No					No					No					No					No
DM10082	Enrollment	Yes	Urban	Joint	7	7	0	No			2012	No					No					No					62	No					No					No					No					No
DM10083	Enrollment	Yes	Urban	Nuclear	2	2	0	Yes	No	Daily	2014	No					No					No					69	No					No					No					No					No
DM10084	Enrollment	Yes	Urban	Joint	8	4	4	Yes	No	Daily	2014	No					No					No					66	No					No					No					No					No
DM10085	Enrollment	Yes	Urban	Nuclear	2	2	0	Yes	No		2012	No					No					No					59	No					No					No					Yes	2015-11-21		5	ORAL	No
DM10086	Enrollment	Yes	Rural	Nuclear	3	3	0	Yes	No	Daily	2007	No					No					No					62	No					No					No					No					No
DM10087	Enrollment	Yes	Urban	Joint	5	4	1	Yes	No	Daily	2015	No					No					No					65	No					No					No					Yes	2014-10-01		5	ORAL	No
DM10088	Enrollment	Yes	Urban	Joint	9	6	3	Yes	No	Daily	2008	No					No					No					61	No					No					No					Yes	2011-01-01		5	ORAL	No
DM10089	Enrollment	Yes	Urban	Nuclear	2	2	0	Yes	No	Daily	2000	No					No					No					60	No					No					No					No					No
DM10090	Enrollment	Yes	Urban	Joint	5	4	1	Yes	Yes	Daily	2012	No					No					No					62	No					No					No					No					No
DM10091	Enrollment	Yes	Urban	Nuclear	2	2	0	Yes	No	Daily	2009	No					No					No					55	No					No					No					No					No
DM10092	Enrollment	Yes	Urban	Nuclear	4	2	2	Yes	No	Daily	2015	No					No					No					45	No					No					No					No					No
DM10093	Enrollment	Yes	Urban	Nuclear	4	3	1	No			2011	No					No					No					66	No					No					No					No					No
DM10094	Enrollment	Yes	Urban	Joint	6	6	0		No		1995	No					No					No					70	No					No					No					No					No
DM10095	Enrollment	Yes	Urban	Nuclear	3	3	0	Yes	No	Daily	2015	No					No					No					57	No					No					No					No					No
DM10096	Enrollment	Yes	Urban	Nuclear	4	3	1	Yes	No	Daily	2015	No					No					No					18	No					No					No					No					No
DM10097	Enrollment	Yes	Urban	Joint	12	11	1	No			2012	No					No					No					75	No					No					No					No					No
DM10098	Enrollment	Yes	Rural	Joint	6	6	0	Yes	No	Daily	2006	No					No					No					69	No					No					No					Yes	2006-01-01		5	ORAL	No
DM10099	Enrollment
DM10100	Enrollment	Yes	Rural	Joint	15	9	6	Yes	No	Daily	2014	No					No					No					65	No					No					No					No					No
DM10101	Enrollment	Yes	Urban	Nuclear	4	4	0	No	No	Daily	1995	No					No					No					51	No					No					No					No					No
DM10102	Enrollment
DM10103	Enrollment	Yes	Rural	Joint	6	4	2	Yes	No	Daily	2006	No					No					No					65	No					No					No					No					No
DM10104	Enrollment	Yes	Urban	Joint	7	7	0	Yes	No	Daily	2000	No					No					No					55	No					No					No					Yes	2015-01-17		5	ORAL	No
DM10105	Enrollment	Yes	Rural	Joint	10	6	4	Yes	No	Daily	2015	No					No					No					67	No					No					No					No					No
DM10106	Enrollment	Yes	Urban	Nuclear	9	5	4	Yes	No	Daily	2004	No					No					No					62	No					No					No					No					No
DM10107	Enrollment	Yes	Urban	Nuclear	6	3	3	Yes	No	Daily	2000	No					No					No					57	No					No					No					No					No
DM10108	Enrollment	Yes	Urban	Nuclear	2	2		No	No	Daily	2012	No					No					No					53	No					No					No					No					No
DM10109	Enrollment	Yes	Urban	Joint	12	6	6	No			2003	No					No					No					60	No					No					No					Yes	2015-09-17		5	ORAL	No
DM10110	Enrollment	Yes	Urban	Nuclear	4	4		No			2009	No					No					No					60	No					No					No					No					No
DM10111	Enrollment	Yes	Urban	Joint	5	3	0	No	No		2012	No					No					No					62	No					No					No					Yes	2012-01-01		1	ORAL	No
DM10112	Enrollment	Yes	Urban	Joint	7	5	2	No	No	Other	2014	No					No					No					65	No					No					No					No					No
DM10113	Enrollment	Yes	Urban	Joint	6	3	3	No	No	Other	2013	No					No					No					65	No					No					No					No					No
DM10114	Enrollment	Yes	Urban	Nuclear	4	4		Yes	No	Daily	2012	No					No					No					55	No					No					No					No					No
DM10115	Enrollment	Yes	Urban	Nuclear	1	1		No	No	Other	2009	No					No					No					60	No					No					No					No					No
DM10116	Enrollment	Yes	Urban	Nuclear	6	4	2	Yes	No	Daily	2008	No					No					No					58	No					No					No					No					No
DM10117	Enrollment	Yes	Urban	Nuclear	4	4		Yes	Yes	Daily	2008	No					No					No					42	No					No					No					Yes	2008-01-01		1	ORAL	No
DM10118	Enrollment	Yes	Urban	Joint	7	7		No	No	Monthly (once in a month)	2000	No					No					No					70	No					No					No					No					No
DM10119	Enrollment	Yes	Urban	Nuclear	8	3	5	No	No	Monthly (once in a month)	2005	No					No					No					55	No					No					No					No					No
DM10120	Enrollment	Yes	Urban	Nuclear	6	6	0	Yes	No		2011	No					No					No					65	No					No					No					Yes	2010-01-01		5	ORAL	No
DM10121	Enrollment	Yes	Urban	Joint	5	5	0	No	No	Other	2012	No					No					No					72	No					No					No					Yes	2015-01-01		5	ORAL	No
DM10122	Enrollment	Yes	Urban	Joint	4	4	0	Yes	No	Daily	2011	No					No					No					42	No					No					No					No					No
DM10123	Enrollment	Yes	Urban	Joint	5	5	0	No	No		2014	No					No					No					55	No					No					No					No					No
DM10125	Enrollment	Yes	Rural	Joint	6	4	2	Yes	No		2012	No					No					No						No					No					No					No					No
DM10126	Enrollment	Yes	Rural	Joint	16	8	8	No	No	Other	2011	No					No					No					70	No					No					No					No					No
DM10127	Enrollment	Yes	Rural	Joint	4		8	No				No					No					No					74	No					Yes	2011-01-01		5	ORAL	No					No					No
DM10128	Enrollment	Yes	Urban	Nuclear	2	2		Yes	No	Daily	2014	No					No					No					61	No					No					No					No					No
DM10129	Enrollment	Yes	Urban	Nuclear	3	3		No	No	Other	2014	No					No					No					62	No					No					No					No					No
DM10130	Enrollment	Yes	Urban	Joint	6	4	2	No	No	Other	2003	No					No					No					63	No					No					No					No					No
DM10131	Enrollment	Yes	Urban	Nuclear	6	3	3	No			2011	No					No					No					60	No					No					No					No					No
DM10132	Enrollment	Yes	Urban	Nuclear	2	2		Yes	No	Daily	2011	No					No					No					73	No					No					No					No					No
DM10133	Enrollment	Yes	Rural	Nuclear	3	3			No		2006	No					No					No					45	No					No					No					No					No
DM10135	Enrollment	Yes	Urban	Nuclear	2	2		Yes	No	Daily	1997	No					No					No					58	No					No					Yes	1997-01-01		1	ORAL	No					No
DM10137	Enrollment	Yes	Rural	Nuclear	4	3	1	No			2009	No					No					No					62	No					No					No					Yes	2009-01-01		1	ORAL	No
DM10138	Enrollment	Yes	Urban	Joint	8	6	2	No	No	Daily	2013	No					No					No					48	No					No					No					No					No
DM10139	Enrollment	Yes	Urban		6	6	0	No				No					No					No					60	No					No					No					No					No
DM10140	Enrollment	Yes	Urban	Nuclear	7	5	2	Yes	No	Daily	2015	No					No					No					55	No					No					No					No					No
DM10141	Enrollment	Yes	Urban	Nuclear	6	4	2	Yes	No	Daily	2012	No					No					No					49	No					No					No					No					No
DM10142	Enrollment	Yes	Urban	Nuclear	3	3		Yes	No	Daily	2006	No					No					No					60	No					No					No					No					No
DM10143	Enrollment	Yes	Urban	Joint	7	3	4	Yes	No	Daily	2006	No					No					No						No					No					No					No					No
DM10144	Enrollment	Yes	Urban	Joint	7	5	2	Yes	No	Daily	2013	No					No					No					45	No					No					No					No					No
DM10145	Enrollment	Yes	Rural	Nuclear	4	4		Yes	No	Daily	2006	No					No					No					66	No					No					No					No					No
DM10146	Enrollment	Yes	Rural	Joint	7	7		Yes	Yes	Daily	2010	No					No					No					60	No					No					No					No					No
DM10147	Enrollment	Yes	Urban	Nuclear	2	2		Yes	No	Daily	2007	No					No					No					55	No					No					No					No					No
DM10148	Enrollment	Yes	Urban	Nuclear	2	2		Yes	No	Daily	2014	No					No					No					59	No					Yes	2014-01-01		300		No					No					No
DM10149	Enrollment	Yes	Urban	Joint	5	3	2	No	No	Other	2012	No					No					No					63	No					No					No					Yes	2012-01-01		5	ORAL	No
DM10150	Enrollment	Yes	Urban	Nuclear	4	4	0	Yes	No	Daily	2013	No					No					No					52	No					No					No					No					No
DM10152	Enrollment	Yes	Urban	Joint	11	5	6	Yes	No	Daily	1995	No					No					No					69	No					No					No					Yes	2012-12-12		5	ORAL	No
DM10153	Enrollment	Yes	Urban	Joint	9	9	0	No	No	Daily	2006	No					No					No					85	No					No					No					No					No
DM10154	Enrollment	Yes	Urban	Joint	5	3	2	Yes	No	Daily		No					No					No					40	No					No					No					No					No
DM10155	Enrollment	Yes	Urban	Nuclear	4	4	0	Yes	No	Daily	2005	No					No					No					64	No					No					No					No					No
DM10156	Enrollment	Yes	Rural	Nuclear	4	4	0	No			2014	No					No					No					60	No					No					No					No					No
DM10157	Enrollment	Yes	Rural	Nuclear	4	4	0	No				No					No					No					75	No					No					No					No					No
DM10158	Enrollment	Yes	Urban	Nuclear	4	4	0	No			2012	No					No					No					65	No					No					No					No					No
DM10159	Enrollment	Yes	Urban	Nuclear	3	3	0	No	No		2002	No					No					No					76	No					No					No					No					No
DM10160	Enrollment	Yes	Urban	Nuclear				Yes				No					No					No					65	No					Yes	2005-01-01		260	ORAL	No					No					No
DM10161	Enrollment	Yes	Urban	Joint	5	5	0	Yes	No	Daily	1990	No					No					No					75	No					No					No					No					No
DM10162	Enrollment	Yes	Urban	Joint	6	6	0	No			2010	No					No					No					66	No					No					No					Yes	2010-07-14		10	ORAL	No
DM10163	Enrollment	Yes	Rural	Nuclear	3	3	0	No	No	Other	2005	No					No					No					65	No					No					No					No					No
DM10164	Enrollment	Yes	Urban	Joint	4	4	0	No	No	Daily	2006	No					No					No					60	No					No					No					No					No
DM10165	Enrollment	Yes	Urban	Joint	7	5	2	Yes	No	Daily	2015	No					No					No					64	No					No					No					No					No
DM10166	Enrollment	Yes	Rural	Joint	5	4	1	Yes	No	Daily	2005	No					No					No					57	No					No					No					No					No
DM10167	Enrollment	Yes	Urban	Nuclear	5	5	0	Yes			1995	No					No					No					67	No					No					No					No					No
DM10168	Enrollment	Yes	Urban	Joint	4	4	0	No		Other	2005	No					No					No					52	No					No					No					No					No
DM10169	Enrollment	Yes	Rural	Nuclear	3	3	0	Yes			1985	No					No					No					61	No					Yes	2010-01-01		15	ORAL	No					No					No
DM10170	Enrollment	Yes	Urban	Joint	3	3	0	No			2012	No					No					No					52	No					No					No					Yes	2012-08-01		5	ORAL	No
DM10171	Enrollment	Yes	Urban	Joint	5	5	0	No	No	Other	2012	No					No					No					65	No					Yes	2012-01-01		12	SC	No					No					No
DM10172	Enrollment	Yes	Urban	Joint	4	3	1	No	No	Other		No					No					No					65	No					No					No					No					No
DM10173	Enrollment	Yes	Urban	Joint	5	3	2	Yes	No	Daily	1980	No					No					No					62	No					No					No					No					No
DM10174	Enrollment	Yes	Urban	Joint	6	3	3	Yes	No	Weekly (once in a week)	2010	No					No					No					70	No					No					No					No					No
DM10175	Enrollment	Yes	Urban	Nuclear	2	2	0	Yes	No		2014	No					No					No					65	No					No					No					No					No
DM10176	Enrollment	Yes	Urban	Nuclear	5	2	3	Yes	No	Weekly (once in a week)	2013	No					No					No					40	No					Yes	2015-05-27		12	ORAL	No					No					No
DM10177	Enrollment	Yes	Urban	Nuclear	1	1	0	No	No		2005	No					No					No					65	No					No					No					No					No
DM10178	Enrollment	Yes	Urban	Nuclear	3	3	0	No			2005	No					No					No					50	No					No					No					No					No
DM10179	Enrollment	Yes	Urban	Nuclear	3	3	0	Yes	No	Daily	2011	No					No					No					44	No					No					No					No					No
DM10180	Enrollment	Yes	Urban	Nuclear	3	3	0	No	No			No					No					No					66	No					No					No					No					No
DM10181	Enrollment	Yes	Urban	Joint	8	7	1	No			1998	No					No					No					65	No					No					No					Yes	2000-01-01		5	ORAL	No
DM10182	Enrollment	Yes	Urban	Nuclear	4	4	0	No			2000	No					No					No					77	No					No					No					No					No
DM10183	Enrollment	Yes	Urban	Joint	6	4	2	Yes	No	Daily	2014	No					No					No					68	No					No					No					No					No
DM10184	Enrollment	Yes	Urban	Joint	6	3	3	Yes	No	Daily	2003	No					No					No					44	No					No					No					Yes	2004-01-01		1	ORAL	No
DM10185	Enrollment	Yes	Urban	Nuclear	1	1	0	No			1995	No					No					No					65	No					No					No					No					No
DM10186	Enrollment	Yes	Urban	Joint	6	4	2	No			2013	No					No					No					60	No					No					No					No					No
DM10187	Enrollment	Yes	Urban	Nuclear	6	4	2	No			2009	No					No					No					55	No					No					Yes	2009-01-01		5	ORAL	No					No
DM10188	Enrollment	Yes	Rural	Joint	3	2	1	Yes	No	Daily	2012	No					No					No					65	No					No					No					Yes	2013-01-01		5	ORAL	No
DM10189	Enrollment	Yes	Urban	Joint	4	3	1	No	No	Other	2012	No					No					No					45	No					No					No					No					No
DM10190	Enrollment	Yes	Urban	Joint	4	2	2	Yes	No	Daily	2008	No					No					Yes	2008-01-01		300	ORAL	30	No					No					No					No					No
DM10191	Enrollment	Yes	Urban	Joint	4	2	2	No	No	Other	2015	No					No					No					35	No					No					No					No					No
DM10193	Enrollment	Yes	Urban	Joint	9	8	1	Yes	No		2011	No					No					No					77	No					No					No					No					No
DM10194	Enrollment	Yes	Urban	Joint	10	5	5	No	No		2013	No					No					No					70	No					No					No					No					No
DM10195	Enrollment	Yes	Rural	Joint	5	3	2	No	No		2012	No					No					No					55	No					No					No					No					No
DM10196	Enrollment	Yes	Urban	Joint	5	4	1	Yes	No	Daily	2000	No					No					No					65	No					No					No					No					No
DM10197	Enrollment	Yes	Urban	Joint	7	5	2	Yes	No	Daily	2013	No					No					No					34	No					No					No					No					No
DM10199	Enrollment	Yes	Rural	Joint	7	4	3	No			1998	No					No					No					60	No					No					No					No					No
DM10200	Enrollment	Yes	Urban	Joint	6	4	2	No			2015	No					No					No					48	No					No					No					No					No
DM10202	Enrollment	Yes	Urban	Joint	5	4	1	Yes	No	Daily	1992	No					No					No					42	No					No					No					No					No
DM10203	Enrollment	Yes	Urban	Nuclear	5	5	0	No	No		2010	No					No					No					84	No					No					No					No					No
DM10204	Enrollment	Yes	Urban	Joint	8	3	5	No	No	Other	2010	No					No					No					36	No					No					No					No					No
DM10205	Enrollment	Yes	Urban	Nuclear	2	2	0	Yes	No	Daily	2007	No					No					No					66	No					No					No					No					No
DM10206	Enrollment	Yes	Urban	Joint	6	4	2	No	No	Other	2000	No					No					No					65	No					No					No					No					No
DM10207	Enrollment	Yes	Urban	Nuclear	4	3	1		No		2012	No					No					No					73	No					No					No					No					No
DM10208	Enrollment	Yes	Urban	Nuclear	1	1	0	Yes	Yes		2012	No					No					No					65	No					No					No					No					No
DM10209	Enrollment	Yes	Rural	Nuclear	4	3	1	No			2012	No					No					No					70	No					No					No					No					No
DM10210	Enrollment	Yes	Urban	Nuclear	4	2	2	Yes	No		2014	No					No					No					44	No					No					No					No					No
DM10211	Enrollment	Yes	Rural	Nuclear	6	4	2	Yes	No		2012	No					No					No					60	No					No					No					No					No
DM10212	Enrollment	Yes	Urban	Nuclear	3	3	0	Yes	No	Daily	2005	No					No					No					42	No					No					No					Yes	2014-01-01		5	ORAL	No
DM10213	Enrollment	Yes	Urban	Joint	5	5	0	Yes	No	Daily	2007	No					No					No					61	No					No					No					Yes	2006-01-01		5	ORAL	No
DM10214	Enrollment	Yes	Urban	Nuclear	3	2	1	Yes	No		2014	No					No					No					47	No					No					No					No					No
DM10215	Enrollment	Yes	Rural	Nuclear	5	4	1	Yes	No		2014	No					No					No					55	No					No					No					No					Yes	2014-01-01
DM10216	Enrollment	Yes	Urban	Nuclear	2	2	0	Yes	Yes	Daily	2012	No					No					No					55	No					No					No					No					No
DM10217	Enrollment	Yes	Urban	Nuclear	4	4	0	Yes	No		2015	No					No					No					60	No					No					No					No					No
DM10218	Enrollment	Yes	Urban	Nuclear	2	2	0	No	No	Daily	1998	No					No					No					44	No					No					No					No					No
DM10219	Enrollment	Yes	Urban	Nuclear	3	3	0	Yes	No	Daily	2007	No					No					No					49	No					No					Yes	2008-01-01		5	ORAL	No					No
DM10222	Enrollment	Yes	Urban	Nuclear	2	2	0	Yes	No	Daily	2010	No					No					No					58	No					No					No					Yes	2010-01-01		2.5	ORAL	No
DM10224	Enrollment	Yes	Urban	Nuclear	2	2	0	Yes	No	Daily	2013	No					No					No					48	No					No					No					No					No
DM10225	Enrollment	Yes	Urban	Joint	6	5	1	No	No	Other	2013	No					No					No					60	No					No					No					No					No
DM10226	Enrollment	Yes	Urban	Joint	7	4	3	No	No	Other		No					No					No					65	No					No					No					No					No
DM10227	Enrollment	Yes	Rural	Joint	6	6	0	Yes	No	Daily	2009	No					No					No					51	No					No					No					No					No
DM10228	Enrollment	Yes	Rural	Joint	6	6	0	No	No	Other	2001	No					No					No					62	No					No					No					Yes	2006-01-01		5	ORAL	No
DM10229	Enrollment	Yes	Urban	Joint	4	3	1	Yes	No	Daily	2013	No					No					No					46	No					No					No					No					No
DM10230	Enrollment	Yes	Urban	Joint	6	4	2	Yes	No	Daily	2013	No					No					No					54	No					No					No					No					No
DM10232	Enrollment	Yes	Urban	Nuclear	4	4	0	Yes	No	Daily	2012	No					No					No					42	No					No					No					No					No
DM10233	Enrollment	Yes	Urban	Joint	5	3	2	Yes	No	Daily	2011	No					No					No					58	No					No					No					No					No
DM10234	Enrollment	Yes	Urban	Joint	10	6	4	Yes	No	Daily	2002	No					No					No					66	No					No					No					Yes	2009-01-01		1	ORAL	No
DM10235	Enrollment	Yes	Urban	Joint	6	4	2	Yes	No	Daily	2008	No					No					No					70	No					No					No					Yes	2008-01-01		5	ORAL	No
DM10236	Enrollment	Yes	Urban	Nuclear	2	2	0	No	No		2014	No					No					No					60	No					No					No					No					No
DM10237	Enrollment	Yes	Urban	Nuclear	5	3	2	No	No		2008	No					No					No					64	No					No					No					No					No
DM10238	Enrollment	Yes	Urban	Joint	6	4	2	Yes	No		2004	No					No					No					66	No					No					No					No					No
DM10239	Enrollment	Yes	Urban	Nuclear	4	3	1	No	No		2011	No					No					No					70	No					No					No					No					No
DM10240	Enrollment	Yes	Urban	Joint	5	4	1	Yes	No	Daily	2001	No					No					No					57	No					No					No					No					No
DM10241	Enrollment	Yes	Urban	Joint	4	2	2	Yes	No	Daily	2000	No					No					No					52	No					No					No					No					No
DM10242	Enrollment	Yes	Urban	Joint	8	5	3	No	No			No					No					No					60	No					No					No					No					No
DM10244	Enrollment	Yes	Urban	Nuclear	5	3	2	Yes	Yes				2015-01-01				No					No					42	No					No					No					No					No
DM10246	Enrollment	Yes	Urban	Nuclear	1	2	0	Yes	No		2012	No					No					No					60	No					No					No					No					No
DM10247	Enrollment	Yes	Rural	Nuclear	3	3	0	No	No		2014	No					No					No					44	No					No					No					No					No
DM10248	Enrollment	Yes	Rural	Nuclear	5	5	0	No	No		2011	No					No					No					50	No					No					No					No					No
DM10249	Enrollment	Yes	Rural	Nuclear	4	2	2		No		1980	No					No					No					67	No					No					No					Yes	2009-09-09		5	ORAL	No
DM10250	Enrollment	Yes	Urban	Joint	6	5	1	Yes	No	Daily	2010	No					No					No						No					No					No					No					No
DM10251	Enrollment	Yes	Urban	Joint	5	4	1	Yes	Yes	Daily	2013	Yes	2014-04-30			SC	No					No					60	No					No					No					No					No
DM10252	Enrollment	Yes	Urban	Joint	4	3	1	Yes	No	Daily		No					No					No					46	No					No					No					No					No
DM10253	Enrollment	Yes	Urban		6	4	2	No	No		2010	No					No					No					60	No					No					No					No					No
DM10262	Enrollment	Yes	Urban	Nuclear	4	3	1	Yes	No		2009	No					No					No					58	No					No					No					No					No
DM10263	Enrollment	Yes	Urban	Joint	9	8	1	No	No		2014	No					No					No					60	No					No					No					No					No
DM10264	Enrollment	Yes	Urban	Nuclear	5	3	2	No	No		2011	No					No					No					53	No					No					No					No					No
DM10265	Enrollment	Yes	Urban	Joint	13	6	7	No			2000	No					No					No					60	No					No					No					No					No
DM10266	Enrollment	Yes	Urban	Joint	11	6	4	Yes	Yes	Daily	2005	No					No					No					57	No					No					No					Yes	2005-01-01		5	ORAL	No
DM10267	Enrollment
DM10268	Enrollment	Yes	Urban	Nuclear	2	1	1	Yes	Yes	Daily	2013	No					No					No					55	No					No					No					No					No
DM10269	Enrollment	Yes	Rural	Nuclear	1	2	0	No	No		2015	No					No					No					60	No					No					No					No					No
DM10270	Enrollment	Yes	Urban	Nuclear	5	3	2	No	No		2014	No					No					No					60	No					No					No					No					No
DM10271	Enrollment	Yes	Rural	Nuclear	4	3	1	Yes	No		1991	No					No					No					50	No					No					No					No					No
DM10272	Enrollment	Yes	Rural	Nuclear	5	5	0	Yes	No	Daily	2009	No					No					No					61	No					No					No					No					No
DM10273	Enrollment	Yes	Rural	Nuclear	2	2	0	No	No		2004	No					No					No					52	No					No					No					No					No
DM10274	Enrollment	Yes	Rural	Joint	9			No	No		2012	No					No					No					34	No					No					No					No					No
DM10275	Enrollment	Yes	Urban	Joint	6	4	2	Yes	No	Weekly (once in a week)	2013	No					No					No					50	No					No					No					No					No
DM10276	Enrollment	Yes	Urban	Joint	6	4	2	Yes	No	Daily	2001	No					No					No					69	No					No					No					No					No
DM10277	Enrollment	Yes	Urban	Joint	3	3	0	No	No	Other	2008	No					No					No					49	No					No					No					No					No
DM10278	Enrollment	Yes	Urban	Joint	3	3	0	Yes	No	Daily	2012	No					No					No					48	No					No					No					No					No
DM10279	Enrollment	Yes	Urban	Joint	4	3	1	Yes	No	Daily	2003	No					No					No					45	No					No					No					No					No
DM10280	Enrollment	Yes	Urban	Joint	4	3	1	No	No	Other	2003	No					No					No					69	No					No					No					No					No
DM10281	Enrollment	Yes	Rural	Nuclear	5	5	0	No	No		2012	No					No					No					50	No					No					No					No					No
DM10282	Enrollment	Yes	Urban	Joint	8	8		No	No	Other	1994	No					No					No					60	No					No					No					No					No
DM10283	Enrollment	Yes	Urban	Joint	5	5		Yes	No		2014	No					No					No					53	No					No					No					No					No
DM10284	Enrollment	Yes	Urban	Nuclear	4	2	2	No			2015	No					No					No					39	No					No					No					No					No
DM10285	Enrollment	Yes	Urban	Joint	3	2	1	Yes	No	Daily	2013	No					No					No					64	No					No					No					No					No
DM10286	Enrollment	Yes	Urban	Joint	12	6	6	Yes	No	Daily		No					No					No					59	No					No					No					No					No
DM10287	Enrollment
DM10288	Enrollment	Yes	Urban	Nuclear			6	Yes	No		2010	No					No					No					40	No					No					No					No					No
DM10294	Enrollment	Yes	Urban	Nuclear	1	1	0	No	No		2006	No					No					No					65	No					No					No					Yes	2015-07-24		5	ORAL	No
DM10295	Enrollment	Yes	Urban	Nuclear	1	1	0	Yes	No	Daily	2008	No					No					No					65	No					No					No					Yes	2012-08-21		1	ORAL	No
DM10296	Enrollment	Yes	Rural	Nuclear	4	4	0	No	No		2010	No					No					No					40	No					No					No					No					No
DM10297	Enrollment	Yes	Urban	Nuclear	1	1	0	No	No		200	No					No					No					60	No					No					No					No					No
DM10298	Enrollment	Yes	Urban	Nuclear	5	3	2	No	No		2010	No					No					No					73	No					No					No					No					No
DM10299	Enrollment	Yes	Urban	Nuclear	3	2	1	No	No		2015	No					No					No					55	No					No					No					No					No
DM10300	Enrollment	Yes	Urban	Nuclear	6	4	2	No			2014	No					No					No					60	No					No					No					No					No
DM10301	Enrollment
DM10302	Enrollment	Yes	Urban	Nuclear	2	2	0	No		Other	2008	No					No					No					63	No					No					No					No					No
DM10303	Enrollment	Yes	Urban	Nuclear	1	1		Yes	No	Daily	2013	No					No					No					60	No					No					No					No					No
DM10304	Enrollment	Yes	Urban	Joint	4	4	0	Yes	No	Daily	2009	No					No					No					64	No					No					No					No					No
DM10305	Enrollment	Yes	Urban	Joint	7	5	2	No			2014	No					No					No					64	No					No					No					No					No
DM10306	Enrollment	Yes	Urban	Nuclear	3	3	0	No			2009	No					No					No					50	No					No					No					No					No
DM10307	Enrollment	Yes	Rural	Nuclear	2	2	0	Yes	No		1995	No					No					No					75	No					No					No					No					No
DM10308	Enrollment	Yes	Urban	Joint	13	8	5	No	No	Other	2008	No					No					No					60	No					No					No					No					No
DM10309	Enrollment	Yes	Urban	Nuclear	5	3	2	No			2014	No					No					No					36	No					No					No					No					No
DM10310	Enrollment	Yes	Urban	Joint	6	5	1	Yes	No	Weekly (once in a week)	2012	No					No					No					63	No					No					No					No					No
DM10311	Enrollment	Yes	Urban	Nuclear	2	2		Yes	No		2011	No					No					No					45	No					No					No					No					No
DM10312	Enrollment	Yes	Rural		5	3	2	Yes	No	Weekly (once in a week)	2004	No					No					No					58	No					No					No					No					No
DM10319	Enrollment	Yes	Urban	Joint	8	5	3	Yes	No	Daily	2015	No					No					No					60	No					No					No					No					No
DM10321	Enrollment	Yes	Urban	Joint	7	6	1	Yes	No		2015	No					No					No					60	No					No					No					No					No
DM10322	Enrollment	Yes	Rural	Nuclear	6	5	1	No	No		2000	No					No					No					48	No					No					No					Yes	2014-09-06		1	ORAL	No
DM10323	Enrollment	Yes	Rural	Joint	10	6	4	Yes	No		2015	No					No					No					65	No					No					No					No					No
DM10324	Enrollment	Yes	Rural	Nuclear	4	3	1	Yes	No		2011	No					No					No					69	No					No					No					No					No
DM10325	Enrollment	Yes	Urban	Nuclear	6	4	2	Yes	No	Daily	2009	No					No					No					40	No					No					No					No					No
DM10326	Enrollment	Yes	Rural	Nuclear	6	6		Yes	No	Daily	2000	No					No					No					59	No					No					No					Yes	2014-01-08		5	ORAL	No
DM10327	Enrollment	Yes	Urban	Nuclear	4	4		Yes	No	Daily	2006	No					No					No					54	No					No					No					No					No
DM10328	Enrollment	Yes	Rural	Nuclear	4	4		Yes	No	Daily	2014	No					No					No					53	No					No					No					No					No
DM10329	Enrollment	Yes	Rural	Joint	4	4		Yes	No	Daily	2011	No					No					No					54	No					No					No					No					No
DM10330	Enrollment	Yes	Urban	Nuclear	5	4	1	Yes	No	Daily	2011	No					No					No					41	No					No					No					No					No
DM10331	Enrollment	Yes	Urban	Nuclear	1	1		Yes	No	Daily	2014	No					No					No					72	No					No					No					No					No
DM10332	Enrollment	Yes	Urban	Joint	9	5	4	Yes	No	Weekly (once in a week)	2005	No					No					No					70	No					No					No					No					No
DM10333	Enrollment	Yes	Urban	Nuclear	3	3		Yes	No	Daily	2008	No					No					No					59	No					No					No					No					No
DM10334	Enrollment	Yes	Rural		10	5	5	No	No	Other	2012	No					No					No					62	No					No					No					Yes	2015-06-24		1	ORAL	No
DM10335	Enrollment	Yes	Urban		12	7	5	No	No	Other	2015	No					No					No					55	No					No					No					No					No
DM10336	Enrollment	Yes	Urban	Joint	4	4		No	No	Other	2008	No					No					No					55	No					No					No					No					No
DM10337	Enrollment	Yes	Urban	Joint	5	5		Yes	No	Weekly (once in a week)	2002	No					No					No						No					No					No					No					No
DM10338	Enrollment	Yes	Urban		3	2	1	Yes	No	Weekly (once in a week)	2009	No					No					No					59	No					No					No					No					No
DM10339	Enrollment	Yes	Urban	Nuclear	4	4		Yes	No	Daily	2013	No					No					No					36	No					No					No					No					No
DM10340	Enrollment	Yes	Urban	Nuclear	4	3	1	No			2009	No					No					No					62	No					No					No					No					No
DM10341	Enrollment	Yes	Urban	Nuclear	4	4	0	Yes	No	Daily	2009	No					No					No					70	No					No					No					No					No
DM10342	Enrollment	Yes	Urban	Joint	9	5	4	Yes	No	Daily	1997	No					No					No					63	No					No					No					Yes	2011-04-17		5	ORAL	No
DM10343	Enrollment	Yes	Urban	Joint	6	4	2	Yes	No	Daily	2011	No					No					No					50	No					No					No					No					No
DM10344	Enrollment	Yes	Urban	Nuclear	1	1	0	Yes	No	Daily	2000	No					No					No					64	No					No					No					Yes	2015-01-07		5	ORAL	No
DM10345	Enrollment	Yes	Urban	Joint	3	3	0	Yes	No	Daily	2010	No					No					No					56	No					No					No					No					No
DM10346	Enrollment	Yes	Rural	Joint	9	6	3	Yes	No	Daily	2011	No					No					No					55	No					No					No					Yes	2012-03-09		5	ORAL	No
DM10347	Enrollment	Yes	Urban	Joint	7	5	2	Yes	No	Daily	2010	No					No					No					66	No					No					No					Yes	2012-07-10		5	ORAL	No
DM10348	Enrollment	Yes	Urban	Nuclear	4	2	2	Yes	No	Daily	2010	No					No					No					45	No					No					No					No					No
DM10349	Enrollment	Yes	Urban		6	6	0	Yes	No	Daily	2014	No					No					No					42	No					No					No					No					No
DM10350	Enrollment	Yes	Urban	Nuclear	1			Yes	No	Daily	2015	No					No					No					50	No					No					No					No					No
DM10351	Enrollment	Yes	Urban	Joint	15	8	7	Yes	No	Daily	2005	No					No					No					70	No					No					No					Yes	2005-01-01		5	ORAL	No
DM10352	Enrollment	Yes	Rural	Nuclear	5	3	2	Yes	No		2015	No					No					No					65	No					No					No					No					No
DM10353	Enrollment	Yes	Rural	Nuclear	7	5	2	Yes	No	Daily	2010	No					No					No					45	No					No					No					No					No
DM10354	Enrollment	Yes	Urban	Joint	5	3	2	Yes	No	Daily	1984	No					No					No					63	No					No					No					Yes	2014-12-15		5	ORAL	No
DM10355	Enrollment	Yes	Urban	Joint	15	7	8	No			2005	No					No					No					60	No					No					No					No					No
DM10356	Enrollment	Yes	Urban	Nuclear	4	4		No			2012	No					No					No					78	No					No					No					No					No
DM10357	Enrollment	Yes	Urban	Nuclear	2	2		Yes	No	Daily	2008	No					No					No					72	No					No					No					No					No
DM10358	Enrollment	Yes	Urban	Nuclear	7	6	1	Yes	No	Daily	2009	No					No					No					56	No					No					No					No					No
DM10359	Enrollment	Yes	Rural	Joint	8	6	2	Yes	No	Daily	2009	No					No					No					61	No					No					No					No					No
DM10360	Enrollment	Yes	Rural	Joint	14	10	4	Yes	No	Daily	1998	No					No					No					68	No					No					No					No					No
DM10361	Enrollment	Yes	Urban		4	3	1	Yes	No		2005	No					No					No					40	No					No					No					No					No
DM10362	Enrollment	Yes	Urban	Nuclear	1	1		Yes	Yes	Daily		No					No					No					40	No					No					No					No					No
DM10363	Enrollment	Yes	Urban	Nuclear	2	2		Yes	No	Daily	2011	No					No					No					68	No					No					No					Yes			1		No
DM10364	Enrollment	Yes	Urban	Nuclear	5	5		No			2001	No					No					No					62	No					No					No					No					No
DM10365	Enrollment	Yes	Urban		1	1		No			2010	No					No					No					67	No					No					No					No					No
DM10366	Enrollment	Yes	Urban	Nuclear	1	1		No			2010	No					No					No					65	No					No					No					No					No
DM10367	Enrollment	Yes	Urban	Nuclear	4	3	1	Yes	No		2008	No					No					No					58	No					No					No					No					No
DM10368	Enrollment	Yes	Urban	Joint	9	6	3	Yes	No		2011	No					No					No					60	No					No					No					No					No
DM10369	Enrollment	Yes	Rural	Nuclear	2	2		Yes	No		2002	No					No					No					68	No					No					No					No					No
DM10370	Enrollment	Yes	Urban	Nuclear	4	4		Yes	No		2012	No					No					No					52	No					No					No					No					No
DM10371	Enrollment	Yes	Urban	Joint	9	8	1	No	No	Other	2014	No					No					No					49	No					No					No					No					No
DM10372	Enrollment	Yes	Rural	Nuclear	4	3	1	Yes	No	Daily	2002	No					No					No					48	No					No					No					No					No
DM10373	Enrollment	Yes	Rural	Joint	2	2		Yes	Yes	Daily	2009	No					No					No					60	No					No					No					No					No
DM10375	Enrollment	Yes	Urban	Nuclear	3	3		Yes	No	Weekly (once in a week)	2006	No					No					No					65	No					No					No					No					No
DM10376	Enrollment	Yes	Rural	Joint	5	4	1	Yes	No	Daily	2013	No					No					No					66	No					No					No					No					No
DM10377	Enrollment	Yes	Urban	Nuclear	5	5		Yes	No	Daily	2013	No					No					No					46	No					No					No					Yes	2013-01-01		5	ORAL	No
DM10378	Enrollment	Yes	Urban	Nuclear	1	1		Yes	No		2010	No					No					No					64	No					No					No					No					No
DM10379	Enrollment	Yes	Rural	Nuclear	3	3		Yes	No		2012	No					No					No					65	No					No					No					No					No
DM10380	Enrollment	Yes	Urban	Joint	7	7		Yes	No		2015	No					No					No					71	No					No					No					No					No
DM10381	Enrollment	Yes	Urban	Nuclear	5	4	1	No		Weekly (once in a week)	1988	No					No					No					64	No					No					No					No					No
DM10382	Enrollment	Yes	Rural	Nuclear	3	3		Yes	No	Daily	2013	No					No					No					53	No					No					Yes	2015-03-22		5	ORAL	No					No
DM10384	Enrollment	Yes	Urban	Nuclear	4	4		Yes	No		2015	No					No					No					63	No					No					No					No					No
DM10385	Enrollment	Yes	Urban	Joint	6	5	1	Yes	Yes	Daily	2007	No					No					No					57	No					No					No					Yes	2007-01-01		5	ORAL	No
DM10386	Enrollment	Yes	Rural	Nuclear	8	6	2	Yes	No	Daily	2006	No					No					No					60	No					No					No					No					No
DM10387	Enrollment	Yes	Urban	Nuclear	5	4	1	Yes	No	Weekly (once in a week)	2011	No					No					No					50	No					No					No					No					No
DM10388	Enrollment	Yes	Urban	Joint	4	3	1	No	No	Other	2000	No					No					No					66	No					No					No					No					No
DM10389	Enrollment	Yes	Urban	Joint	6	4	2	Yes	No	Daily	2012	No					No					No					60	No					No					No					No					No
DM10390	Enrollment	Yes	Urban	Joint	5	3	2	No	No	Weekly (once in a week)	2011	No					No					No					61	No					No					No					No					No
DM10391	Enrollment	Yes	Urban	Joint	6	4	2	No	Yes	Daily	2005	No					No					No					55	No					No					No					No					No
DM10392	Enrollment	Yes	Urban	Joint	7	4	3	Yes	No	Weekly (once in a week)	2009	No					No					No					55	No					No					No					No					No
DM10393	Enrollment	Yes	Urban	Nuclear	4	4		No			2011	No					No					No					50	No					No					No					Yes	2013-01-01		5	ORAL	No
DM10394	Enrollment	Yes	Urban	Nuclear	6	4	2	No			2007	No					No					No					46	No					No					No					Yes	2007-01-01		5		No
DM10395	Enrollment	Yes	Urban		4	4		Yes	No	Daily	1999	No					No					No					75	No					No					No					No					No
DM10396	Enrollment	Yes	Urban	Joint	4	4		Yes	No	Daily	2004	No					No					No					58	No					No					No					No					No
DM10397	Enrollment	Yes	Urban	Joint	7	7	0		No	Other	2000	No					No					No					62	No					No					No					No					No
DM10399	Enrollment	Yes	Urban	Nuclear	5	5		No	No	Daily	2005	No					No					No					54	No					No					No					No					No
DM10400	Enrollment	Yes	Rural	Nuclear	5	5		No			2012	No					No					No					66	No					No					No					No					No
DM10401	Enrollment	Yes	Urban	Nuclear	2	2		Yes	No	Daily	2014	No					No					No					52	No					No					No					No					No
DM10402	Enrollment	Yes	Urban	Nuclear	3	2	1	Yes	No	Daily	2007	No					No					Yes	2008-01-01				28	No					No					No					No					No
DM10403	Enrollment	Yes	Urban	Nuclear	4	4	0	No			2010	No					No					No					52	No					No					No					No					No
DM10404	Enrollment	Yes	Urban	Nuclear	2	1	1	No	No	Other	2014	No					No					No					55	No					No					No					No					No
DM10405	Enrollment	Yes	Urban	Joint	3	3		Yes	No	Daily	2010	No					No					No					62	No					No					No					Yes	2010-01-01		10	ORAL	No
DM10406	Enrollment	Yes		Joint	5	4	1	Yes	No	Daily	2002	No					No					No					60	No					No					No					No					No
DM10407	Enrollment	Yes	Rural	Joint	6	4	2	Yes	No		2010	No					No					No					62	No					No					No					No					No
DM10408	Enrollment	Yes	Urban	Joint	8	7	1	No	No		2011	No					No					No					58	No					No					No					No					No
DM10409	Enrollment	Yes	Urban	Joint	10	7	3	No	No		2010	No					No					No					50	No					No					No					No					No
DM10410	Enrollment	Yes	Urban	Nuclear	6	3	3	No	No		2000	No					No					No					60	No					No					No					Yes	2011-07-06		5	ORAL	No
DM10411	Enrollment	Yes	Urban	Nuclear	2	2	0	Yes	No	Daily	2007	No					No					No					73	No					No					No					No					No
DM10412	Enrollment	Yes	Urban		2	2		Yes	No	Daily	2005	No					No					No					57	No					No					No					No					No
DM10413	Enrollment	Yes	Urban	Nuclear	1	1		No	No		2010	No					No					No					60	No					No					No					No					No
DM10414	Enrollment	Yes	Urban	Joint	8	6	2	Yes	No		1985	No					No					No					65	No					No					No					Yes	1990-01-01			ORAL	No
DM10415	Enrollment	Yes	Urban	Nuclear	2	2		Yes	No	Daily	2014	No					No					No					62	No					No					No					Yes	2014-01-01		100	ORAL	No
DM10416	Enrollment	Yes	Urban	Joint	4	4		Yes	No	Daily	2009	No					No					No					56	No					No					No					Yes	2009-01-01		5	ORAL	No
DM10417	Enrollment	Yes	Urban	Nuclear	4	2	2	Yes	No		2010	No					No					No					38	No					No					No					No					No
DM10418	Enrollment	Yes	Urban	Nuclear	2	2		No			2010	No					No					No					67	No					No					No					No					No
DM10419	Enrollment	Yes	Urban	Nuclear	2	2		No			2015	No					No					No					60	No					No					No					No					No
DM10420	Enrollment	Yes	Urban	Nuclear	4	3	1	No			2015	No					No					No					46	No					No					No					No					No
DM10421	Enrollment	Yes	Urban	Nuclear	4	3	1	No	No		1990	No					No					No					74	No					No					No					No					No
DM10422	Enrollment	Yes	Urban	Joint	3	3	0	Yes	No	Daily	2014	No					No					No					54	No					No					No					No					No
DM10423	Enrollment	Yes	Rural	Nuclear	2	2		Yes	No	Daily	2015	No					No					No					40	No					No					No					No					No
DM10424	Enrollment	Yes	Urban	Joint	6	6		No	No	Other	2012	No					No					No					76	No					No					No					No					No
DM10425	Enrollment	Yes	Urban	Nuclear	1	1	0	No	No	Other	2012	No					No					No					72	No					No					No					No					No
DM10426	Enrollment	Yes	Urban	Nuclear	1	1	0	No	No	Other		No					No					No					77	No					No					No					No					No
DM10427	Enrollment	Yes	Urban	Nuclear	4	2	2	Yes	No	Daily	2015	No					No					No					48	No					No					No					No					No
DM10428	Enrollment	Yes	Urban	Nuclear	8	2	6	Yes	No	Daily	2009	No					No					No					54	No					No					No					No					No
DM10429	Enrollment	Yes	Urban	Nuclear	5	5	0	Yes	No	Daily	2009	No					No					No					54	No					No					No					No					No
DM10430	Enrollment	Yes	Urban	Joint	6	4	2	No			2009	No					No					No					73	No					No					No					No					No
DM10431	Enrollment	Yes	Urban		10	6	4	No	No		2010	No					No					No					58	No					No					No					Yes	2010-01-01		5	ORAL	No
DM10432	Enrollment	Yes	Urban	Nuclear	3	2	1	Yes	No		2012	No					No					No					50	No					No					No					No					No
DM10433	Enrollment	Yes	Urban		4	3	1	Yes	No	Daily	2013	No					No					No					60	No					No					No					No					No
DM10434	Enrollment	Yes	Urban	Nuclear	3	3		Yes	No		2000	No					No					No					52	No					No					No					Yes	2011-01-01		1	ORAL	No
DM10435	Enrollment	Yes	Urban	Joint	6	3	3	No	No	Other	2013	No					No					No					60	No					No					No					No					No
DM10436	Enrollment	Yes	Rural	Nuclear	5	5					2012	No					No					No					59	No					No					No					No					No
DM10437	Enrollment	Yes	Urban		6	4	2	Yes	No	Weekly (once in a week)	2005	No					No					No					69	No					No					No					Yes	2015-01-01		5	ORAL	No
DM10438	Enrollment	Yes	Rural	Joint	12	9	3	Yes	No	Weekly (once in a week)	2010	No					No					No					65	No					No					No					No					No
DM10439	Enrollment	Yes	Urban	Joint	4	2	2	Yes	No	Daily	2014	No					No					No					40	No					No					No					No					No
DM10440	Enrollment	Yes	Urban	Joint	6	6	0	Yes	No	Weekly (once in a week)	2006	No					No					No					67	No					No					No					No					No
DM10441	Enrollment	Yes	Urban	Nuclear	13	7	5	Yes	No		2007	No					No					No					64	No					No					No					No					No
DM10442	Enrollment	Yes	Urban	Joint	8	8	2	No	No		2010	No					No					No					65	No					No					No					Yes	2010-01-01		5	ORAL	No
DM10443	Enrollment
DM10444	Enrollment
DM10445	Enrollment	Yes	Rural	Joint	6	6	0	Yes	No	Daily	2009	No					No					No					58	No					No					No					No					No
DM10446	Enrollment	Yes	Urban	Joint	4	3	1	No	No	Other	1999	No					No					No					51	No					No					No					Yes	2015-01-01		5	ORAL	No
DM10447	Enrollment	Yes	Urban	Nuclear	2	2	0	Yes	No	Daily	2012	No					No					No					40	No					No					No					No					No
DM10448	Enrollment	Yes	Urban	Joint	5	3	2	No	No	Other	2010	No					No					No					49	No					No					No					No					No
DM10449	Enrollment	Yes	Urban	Nuclear	3	3		Yes	No	Daily	2000	No					No					No					41	No					No					No					No					No
DM10450	Enrollment	Yes	Urban	Nuclear	4	4		Yes	No		2000	No					No					No					59	No					No					No					No					No
DM10452	Enrollment	Yes	Urban	Joint	6	5	1	Yes	No	Daily	2009	No					No					No					64	No					No					No					No					No
DM10453	Enrollment	Yes	Urban	Nuclear	4	4		Yes	No	Daily	1997	No					No					No					66	No					No					No					No					No
DM10454	Enrollment	Yes	Urban	Nuclear	2	2		Yes	No	Daily	2010	No					No					No					60	No					No					No					No					No
DM10455	Enrollment	Yes	Urban	Joint	7	5	2	Yes	No	Daily	2000	No					No					No					45	No					No					No					Yes	2015-08-19		5	ORAL	No
DM10456	Enrollment	Yes	Rural	Joint	13	5	8	No	No	Daily	2012	No					No					No					65	No					No					No					No					No
DM10457	Enrollment	Yes	Urban	Joint	4	3	1	Yes	No	Daily	2000	No					No					No					73	No					No					No					Yes	2000-01-01		5	ORAL	No
DM10458	Enrollment	Yes	Urban	Nuclear	4	2	2	Yes	No	Daily	2006	No					No					No					32	No					No					No					Yes	2011-09-14		5	ORAL	No
DM10459	Enrollment	Yes	Urban	Joint	9	5	4	Yes	No		2015	No					No					No					62	No					No					No					No					No
DM10460	Enrollment	Yes	Rural	Nuclear	3	2	1	Yes	No		2012	No					No					No					37	No					No					No					No					No
DM10462	Enrollment	Yes	Urban	Joint	12	6	6	Yes	No		2014	No					No					No					38	No					No					No					No					No
DM10463	Enrollment	Yes	Urban	Nuclear	2	2		Yes	No		2008	No					No					No					61	No					No					No					No					No
DM10464	Enrollment	Yes	Rural	Nuclear	1	1		Yes	No	Daily	2000	No					No					No					40	No					No					No					No					No
DM10465	Enrollment	Yes	Urban	Nuclear	4	4		No	No	Other	1995	No					No					No					70	No					No					No					Yes	2004-01-01		5	ORAL	No
DM10466	Enrollment	Yes	Urban	Joint	5	3	2	Yes	No	Daily	2015	No					No					No					35	No					No					No					No					No
DM10467	Enrollment	Yes	Urban	Joint	5	3	2	Yes	No	Daily	2014	No					No					No					52	No					No					No					No					No
DM10468	Enrollment	Yes	Urban	Joint	4	3	1	Yes	No	Daily	1985	No					No					No					55	No					No					No					Yes	2000-01-01		5	ORAL	No
DM10469	Enrollment	Yes	Urban	Nuclear	2	2		Yes	No	Daily	1994	No					No					No					65	No					No					No					Yes	1999-01-01		5	ORAL	No
DM10470	Enrollment	Yes	Urban	Joint	4	4		Yes	No	Daily	1983	No					No					No					50	No					No					No					No					No
DM10471	Enrollment	Yes	Rural	Joint	6	4	2	Yes	No	Daily	2010	No					No					No					72	No					No					No					Yes	2013-01-01		1	ORAL	No
DM10472	Enrollment	Yes	Urban	Joint	4	3	1	Yes	No	Daily	2010	No					No					No					70	No					No					No					No					No
DM10473	Enrollment	Yes	Urban	Nuclear	5	3	2	Yes	No	Weekly (once in a week)	2015	No					No					No					64	No					No					No					No					No
DM10474	Enrollment	Yes	Urban	Joint	6	4	2	No	No	Other	1995	No					No					No					61	No					No					No					No					No
DM10475	Enrollment	Yes	Urban	Joint	6	4	2	Yes	No	Daily	2015	No					No					No					50	No					No					No					No					No
DM10476	Enrollment	Yes	Urban	Nuclear	2	2		Yes	No	Weekly (once in a week)	2008	No					No					No					55	No					No					No					No					No
DM10477	Enrollment	Yes	Urban	Nuclear	2	2		Yes	No	Daily	2013	No					No					No					63	No					No					No					No					No
DM10478	Enrollment	Yes	Urban	Nuclear	4	2	2	Yes	No	Daily	2012	No					No					No					35	No					No					No					No					No
DM10479	Enrollment	Yes	Urban	Nuclear	6	4	2	Yes	No	Daily	2010	No					No					No					60	No					No					No					No					No
DM10480	Enrollment	Yes	Urban	Joint	17	8	9	Yes	No	Daily	2002	No					No					No					70	No					No					No					No					No
DM10481	Enrollment	Yes	Urban	Joint	6	4	2	No			2015	No					No					No					60	No					No					No					No					No
DM10482	Enrollment	Yes	Urban	Nuclear	2	2	0	Yes	No	Daily	2015	No					No					No					52	No					No					No					No					No
DM10483	Enrollment	Yes	Urban	Joint	6	4	2	No				No					No					No					59	No					No					No					No					No
DM10484	Enrollment	Yes	Urban	Nuclear	1	1		Yes	No	Daily	2010	No					No					No					52	No					No					No					No					No
DM10485	Enrollment	Yes	Urban	Nuclear	3	3	0	Yes	Yes	Daily	2012	No					No					No					43	No					No					No					No					No
DM10486	Enrollment	Yes	Urban	Joint	6	4	2	Yes	No		2015	No					No					No					41	No					No					No					No					No
DM10487	Enrollment
DM10488	Enrollment	Yes	Urban	Joint	7	6	1	No	No		1995	No					No					No					61	No					No					No					No					No
DM10489	Enrollment
DM10490	Enrollment
DM10491	Enrollment
DM10492	Enrollment	Yes	Urban	Joint	4	4		No	No	Daily	2011	No					No					No					61	No					No					No					No					No
DM10493	Enrollment	Yes	Rural	Nuclear	2	2	0	Yes	No	Daily	2015	No					No					No					70	No					No					No					No					No
DM10494	Enrollment	Yes	Urban	Joint	5	4	1	Yes	No	Daily	2009	No					No					No					70	No					No					No					Yes	2009-01-01		5	ORAL	No
DM10495	Enrollment	Yes	Urban	Joint	4	4		Yes	No	Daily	2013	No					No					No					61	No					No					No					No					No
DM10496	Enrollment	Yes	Urban	Joint	4	2	2	Yes	No	Daily	2015	No					No					No					44	No					No					No					No					No
DM10497	Enrollment	Yes	Rural	Nuclear	4	4		No			2008	No					No					No					51	No					No					No					Yes	2007-01-01		5	ORAL	No
DM10498	Enrollment	Yes	Urban	Nuclear	6	5	1	Yes	No		1965	No					No					No					77	No					No					No					No					No
DM10499	Enrollment	Yes	Urban	Joint	6	4	2	Yes	No	Daily	2007	No					No					No					74	No					No					No					No					No
DM10500	Enrollment	Yes	Rural		10	6	4	Yes	No		2014	No					No					No					65	No					No					No					No					No
DM10501	Enrollment	Yes	Urban	Nuclear	4	2	2	Yes	No		2010	No					No					No					45	No					No					No					No					No
DM10502	Enrollment	Yes	Urban	Joint	8	6	2	Yes	No	Daily	2013	No					No					No					55	No					No					No					No					No
DM10503	Enrollment	Yes	Urban	Joint	6	3	3	No	No	Daily	2013	No					No					No					54	No					No					No					No					No
DM10504	Enrollment	Yes	Urban	Nuclear	1	1	0	No	No	Daily	1995	No					No					No					70	No					No					No					Yes	1995-01-01		5	ORAL	No
DM10505	Enrollment	Yes	Urban	Joint	8	6	2	Yes	No	Daily	2012	No					No					No					63	No					No					No					No					No
DM10506	Enrollment	Yes	Urban	Joint	4	3	1	Yes	No		1995	No					No					No					50	No					No					No					Yes	1995-01-01		5	ORAL	No
DM10507	Enrollment	Yes	Urban	Joint	7	6	1	Yes	No	Daily	2009	No					No					No					52	No					No					No					No					No
DM10508	Enrollment	Yes	Rural	Nuclear	8	6	2	Yes	No		2010	No					No					No					58	No					No					No					No					No
DM10510	Enrollment	Yes	Urban	Joint	8	4	4	Yes	No	Daily	2000	No					No					No					60	No					No					No					No					No
DM10511	Enrollment	Yes	Rural	Nuclear	2	2		Yes	No		2000	No					No					No					69	No					No					No					No					No
DM10512	Enrollment	Yes	Urban	Nuclear	2	2		Yes	No	Daily	2001	No					No					No					51	No					No					No					No					No
DM10513	Enrollment	Yes	Urban	Nuclear	7	4	3	Yes	No	Daily	1981	No					No					No					65	No					No					No					No					No
DM10514	Enrollment	Yes	Urban	Nuclear	1	1		No	No	Other	2013	No					No					No					65	No					No					No					No					No
DM10515	Enrollment	Yes	Urban	Nuclear	2	2		Yes	No	Daily	2007	No					No					No					60	No					No					No					No					No
DM10516	Enrollment	Yes	Urban	Nuclear	4	4		Yes	Yes	Daily	2010	No					No					No					49	No					No					No					No					No
DM10517	Enrollment	Yes	Urban	Nuclear	4	4		Yes	No		2015	No					No					No					45	No					No					No					No					No
DM10518	Enrollment	Yes	Rural	Nuclear	1	1		Yes	No	Daily	1980	No					No					No					74	No					No					No					No					No
DM10519	Enrollment	Yes	Urban	Joint	3	3		No	No	Other	2012	No					No					No					62	No					No					No					No					No
DM10520	Enrollment	Yes	Urban	Joint	6	4	2	Yes	No	Daily	2012	No					No					No					63	No					No					No					No					No
DM10521	Enrollment	Yes	Urban	Nuclear	5	3	2	Yes	No	Daily	2010	No					No					No					45	No					No					No					No					No
DM10522	Enrollment	Yes	Urban	Joint	5	3	2	Yes	No	Daily	2009	No					No					No					66	No					No					No					No					No
DM10523	Enrollment	Yes	Urban	Joint	10	5	5	No			1992	No					No					No					70	No					No					No					No					No
DM10524	Enrollment	Yes	Urban	Nuclear	5	3	2	No			2013	No					No					No					60	No					No					No					No					No
DM10525	Enrollment	Yes	Urban	Joint	6	4	2	No			2002	No					No					No					72	No					No					No					No					No
DM10526	Enrollment	Yes	Urban		6	4	2	Yes	No	Daily	2007	No					No					No					47	No					No					No					No					No
DM10527	Enrollment	Yes	Rural	Nuclear	3	2	1	Yes	No	Daily	2012	No					No					No					60	No					No					No					No					No
DM10528	Enrollment	Yes	Urban	Nuclear	3	2	1	Yes			2013	No					No					No					65	No					No					No					No					No
DM10529	Enrollment	Yes	Urban	Nuclear	6	4	2	No			2015	No					No					No					65	No					No					No					Yes	2015-07-08		1	ORAL	No
DM10530	Enrollment	Yes	Urban	Nuclear	3	2	1	No			2005	No					No					No					61	No					No					No					No					No
DM10531	Enrollment	Yes	Urban	Nuclear	6	6		No			2002	No					No					No					70	No					No					No					No					No
DM10532	Enrollment	Yes	Urban	Nuclear	2	2		No			2005	No					No					No					60	No					No					No					No					No
DM10533	Enrollment	Yes	Urban	Nuclear	4	3	1	No			2000	No					No					No					54	No					No					No					No					No
DM10534	Enrollment	Yes	Rural		7	5	2	Yes	No	Daily	2008	No					No					No					51	No					No					No					Yes	2008-01-01		5	ORAL	No
DM10535	Enrollment	Yes	Urban	Joint	1	1		No			2006	No					No					No					65	No					No					No					Yes	2006-01-01		5	ORAL	No
DM10536	Enrollment	Yes	Rural	Nuclear	3	3		Yes	No	Daily	1995	No					No					No					74	No					No					No					No					No
DM10537	Enrollment	Yes	Urban	Nuclear	2	2		No			2006	No					No					No					66	No					No					No					No					No
DM10538	Enrollment	Yes	Urban	Joint	5	4	1	Yes	No	Daily	2011	No					No					No					85	No					No					No					No					No
DM10539	Enrollment	Yes	Rural	Nuclear	5	3	2	No	No		2008	No					No					No					63	No					No					No					No					No
DM10540	Enrollment	Yes	Urban	Nuclear	3	2	1	Yes	No		2015	No					No					No					35	No					No					No					No					No
DM10541	Enrollment	Yes	Urban	Nuclear	4	4		No			2009	No					No					No					55	No					No					No					No					No
DM10542	Enrollment	Yes	Urban	Nuclear	6	4	2	Yes	No		2007	No					No					No					72	No					No					No					Yes	2014-01-15		5	ORAL	No
DM10544	Enrollment	Yes	Urban	Joint	7	6	1	Yes	No	Daily	2009	No					No					No					62	No					Yes	2015-08-26				No					No					No
DM10545	Enrollment	Yes	Urban	Nuclear	5	3	2	Yes	No	Daily	2015	No					No					No					38	No					No					No					No					No
DM10546	Enrollment	Yes	Rural	Nuclear	2	2		Yes	No	Daily	2010	No					No					No					69	No					No					No					Yes			5	ORAL	No
DM10547	Enrollment	Yes	Rural	Nuclear	4	4		No	No		2013	No					No					No					68	No					No					No					No					No
DM10548	Enrollment	Yes	Urban		9	6	3	No	No	Other	2000	No					No					No					60	No					No					No					No					No
DM10549	Enrollment	Yes	Urban		4	2	2	No	No	Other	2012	No					No					No					55	No					No					No					No					No
DM10550	Enrollment	Yes	Urban	Joint	5	3	2	Yes	No	Daily	2007	No					No					No					57	No					No					No					Yes	2007-01-01		5	ORAL	No
DM10551	Enrollment	Yes	Urban	Nuclear	2	2		No			2013	No					No					No					45	No					No					No					No					No
DM10552	Enrollment	Yes	Urban	Nuclear	2	2		No			2011	No					No					No					50	No					No					No					No					No
DM10553	Enrollment	Yes	Urban	Joint	6	6		Yes	No	Daily	2004	No					No					No					40	No					No					No					No					No
DM10554	Enrollment	Yes	Urban	Joint	9	7	2	Yes	No	Daily	2005	No					No					No					59	No					No					No					Yes	2005-01-01		5	ORAL	No
DM10555	Enrollment	Yes	Urban	Joint	6	4	2	No			2013	No					No					No					69	No					No					No					No					No
DM10557	Enrollment	Yes	Urban	Joint	8	5	3	No			2014	No					No					No					65	No					No					No					No					No
DM10558	Enrollment	Yes	Urban	Joint	6	2	4	Yes	No	Daily	2007	No					No					No					27	No					No					No					No					No
DM10559	Enrollment	Yes	Urban	Joint	7	4	3	Yes	No	Daily	2013	No					No					No					59	No					No					No					Yes	2013-11-06		5	ORAL	No
DM10560	Enrollment	Yes	Urban	Joint	6	4	2	Yes	No	Daily	2011	No					No					No					53	No					No					No					No					No
DM10561	Enrollment	Yes	Rural	Nuclear	1	1		No			2012	No					No					No					70	No					No					No					No					No
DM10562	Enrollment	Yes	Urban	Nuclear	3	3		Yes	No	Daily	2009	No					No					No					55	No					No					No					No					No
DM10563	Enrollment	Yes	Rural	Nuclear	2	2		Yes	No		2014	No					No					No					50	No					No					No					No					No
DM10564	Enrollment	Yes	Urban	Nuclear	2	2		Yes	No	Daily	2009	No					No					No					52	No					No					No					Yes	2009-01-01		5	ORAL	No
DM10565	Enrollment
DM10566	Enrollment	Yes	Urban	Nuclear	1	1		No			2010	No					No					No					70	No					No					No					No					No
DM10567	Enrollment	Yes	Urban	Joint	4	2	2	No			2009	No					No					No					36	No					No					No					No					No
DM10568	Enrollment	Yes	Urban	Joint	4	3	1	Yes	No	Daily	2008	No					No					No					69	No					No					No					No					No
DM10569	Enrollment	Yes	Urban	Nuclear	2	2	0	No			2015	No					No					No					55	No					No					No					No					No
DM10570	Enrollment	Yes	Urban	Joint	5	3	1	No			2009	No					No					No					53	No					No					No					Yes			5	ORAL	No
DM10571	Enrollment	Yes	Urban	Nuclear	5	3	2	Yes	No		2011	No					No					No					60	No					No					No					No					No
DM10572	Enrollment	Yes	Urban	Nuclear	4	4		No	No		2015	No					No					No					46	No					No					No					No					No
DM10573	Enrollment	Yes	Rural	Nuclear	2	2		No			2005	No					No					No					74	No					No					No					Yes	2006-01-01		5	NR	No
DM10574	Enrollment	Yes	Urban	Nuclear	5	5		Yes	No		2015	No					No					No					65	No					No					No					No					No
DM10575	Enrollment	Yes	Urban	Nuclear	5	4	1	Yes	No		2009	No					No					No					61	No					No					No					No					No
DM10576	Enrollment	Yes	Urban	Joint	4	3	1	No			2010	No					No					No					74	No					No					No					No					No
DM10577	Enrollment	Yes	Urban	Joint	10	7	3	Yes	No	Daily	2014	No					No					No					35	No					No					No					No					No
DM10579	Enrollment	Yes	Urban		3	3		No	No	Other	1995	No					No					No					80	No					No					No					No					No
DM10580	Enrollment	Yes	Urban	Nuclear	2	2			No	Daily	2000	No					No					No					65	No					No					No					No					No
DM10581	Enrollment	Yes	Urban	Joint	7	5	2	No	No	Other	2012	No					No					No					48	No					No					No					No					No
DM10582	Enrollment	Yes	Urban	Joint	4	3	1	No	No	Other	2011	No					No					No					43	No					No					No					No					No
DM10583	Enrollment	Yes	Urban	Joint	9	6	3	Yes	No	Daily	2012	No					No					No					63	No					No					No					No					No
DM10584	Enrollment	Yes	Urban	Nuclear	4	2	2	Yes	No	Daily	2015	No					No					No					50	No					No					No					No					No
DM10585	Enrollment	Yes	Urban	Joint	6	4	2	No	No	Other	2009	No					No					No					60	No					No					No					No					No
DM10586	Enrollment	Yes	Urban	Nuclear	3	3		No	No	Other	2010	No					No					No					48	No					No					No					Yes	2010-01-01		5	ORAL	No
DM10587	Enrollment	Yes	Rural	Nuclear	4	2	2	Yes	No		2015	No					No					No					49	No					No					No					No					No
DM10588	Enrollment	Yes	Urban	Joint	3	2	1	Yes	No	Daily	2009	No					No					No					68	No					No					No					No					No
DM10589	Enrollment	Yes	Urban	Joint	9	8	1	Yes	No		2006	No					No					No					54	No					No					No					No					No
DM10590	Enrollment	Yes	Urban	Nuclear	6	4	2	Yes	No		2015	No					No					No					45	No					No					No					No					No
DM10591	Enrollment	Yes	Urban	Nuclear	2	2		Yes	No		2011	No					No					No					60	No					No					No					No					No
DM10592	Enrollment	Yes	Urban	Nuclear	2	2	0	Yes	No	Daily	2012	No					No					No					65	No					No					No					No					No
DM10593	Enrollment	Yes	Urban	Nuclear	5	4	1	No	No		2013	No					No					No					67	No					No					No					No					No
DM10594	Enrollment	Yes	Urban	Nuclear	2	2	0	No	No	Other	1995	No					No					No					70	No					No					No					No					No
DM10595	Enrollment	Yes	Urban	Nuclear	3	3	0	Yes	No	Daily	2008	No					No					No					50	No					No					No					No					No
DM10596	Enrollment	Yes	Urban	Nuclear	2	2	0	Yes	No		2009	No					No					No					48	No					No					No					No					No
DM10597	Enrollment	Yes	Urban	Joint	11	6	5	Yes	No	Daily	2010	No					No					No					65	No					No					No					No					No
DM10598	Enrollment	Yes	Urban	Nuclear	1			No			2013	No					No					No					75	No					No					No					No					No
DM10599	Enrollment	Yes	Urban	Nuclear	8	6	2	Yes	No		2005	No					No					No					55	No					No					No					No					No
DM10600	Enrollment	Yes	Rural	Nuclear	2	2		Yes	No		1992					ORAL	No					Yes	1992-01-01		500	ORAL	77	No					No					No					No					No
DM10601	Enrollment	Yes	Rural	Nuclear	6	4	2	No	No		2004	No					No					No					71	No					No					No					No					No
DM10602	Enrollment	Yes	Rural	Nuclear	2	2	0	No			2015	No					No					No					40	No					No					No					No					No
DM10603	Enrollment	Yes	Rural	Nuclear	5	3	2	No			2002	No					No					No					70	No					No					No					No					No
DM10604	Enrollment	Yes	Urban	Joint	6	3	3	Yes	No	Daily	2002	No					No					No					60	No					No					No					No					No
DM10605	Enrollment	Yes	Urban	Joint	5	5	0	No	No	Other	2010	No					No					No					52	No					No					No					No					No
DM10606	Enrollment	Yes	Urban	Joint	3	3	0	Yes	No	Daily	2012	No					No					No					68	No					No					No					No					No
DM10607	Enrollment	Yes	Urban	Joint	4	3	1	No	No	Other	2012	No					No					No					48	No					No					No					No					No
DM10608	Enrollment	Yes	Urban	Nuclear	4	3	1	Yes	No	Daily	2008	No					No					No					61	No					No					No					Yes	2011-01-01		5	ORAL	No
DM10609	Enrollment	Yes	Urban	Joint	6	5	1	Yes	No	Daily	2013	No					No					No					65	No					No					No					No					No
DM10610	Enrollment	Yes	Urban		6	3	3	Yes	No	Daily	2010	No					No					No					50	No					No					No					No					No
DM10611	Enrollment	Yes	Urban	Joint	10	7	3	Yes	No		2008	No					No					No					75	No					No					No					Yes	2008-01-01		1	ORAL	No
DM10612	Enrollment	Yes	Urban	Nuclear	2	2		Yes		Daily	2014	No					No					No					60	No					No					No					No					No
DM10613	Enrollment	Yes	Urban	Joint	9	7	2	Yes		Daily	2008	No					No					No					47	No					No					No					No					No
DM10614	Enrollment	Yes	Rural		6	3	3	Yes	No		2009	No					No					No					43	No					No					No					Yes	2015-08-19		5	ORAL	No
DM10615	Enrollment	Yes	Urban	Joint	9	5	4	Yes			2013	No					No					No					50	No					No					No					No					No
DM10616	Enrollment	Yes	Urban	Nuclear	2	2		No			2013	No					No					No					65	No					No					No					No					No
DM10617	Enrollment	Yes	Urban		7	4	3	Yes	No	Daily	2013	No					No					No					55	No					No					No					No					No
DM10619	Enrollment	Yes	Urban	Nuclear	2	1	1	Yes	No	Daily	2013	No					No					No					66	No					No					No					Yes	2014-01-01		5	ORAL	No
DM10620	Enrollment	Yes	Urban	Joint	5	3	2	No	No	Other	2015	No					No					No					65	No					No					Yes	2015-09-01		5	ORAL	No					No
DM10621	Enrollment	Yes	Urban		4	4		Yes	No	Daily	2012	No					No					No					55	No					No					No					No					No
DM10622	Enrollment	Yes	Urban	Nuclear	5	5		Yes	No	Daily	2013	No					No					No					46	No					No					No					Yes	2015-07-15		2	ORAL	No
DM10623	Enrollment	Yes	Urban	Joint	6	3	3	No	No	Other	2007	No					No					No					57	No					No					No					No					No
DM10624	Enrollment	Yes	Urban	Joint	11	7	4	No	No	Other	2000	No					No					No					54	No					No					No					Yes	2000-01-01		2	ORAL	No
DM10625	Enrollment	Yes	Rural	Nuclear	1	1		Yes	No		2005	No					No					No					68	No					No					No					No					No
DM10626	Enrollment	Yes	Rural	Nuclear	3	3		No			2010	No					No					No					54	No					No					No					No					No
DM10627	Enrollment	Yes	Urban	Nuclear	4	2	2	Yes	Yes	Daily	2010	No					No					No					48	No					No					No					No					No
DM10628	Enrollment	Yes	Rural	Nuclear	6	4	1	No			2009	No					No					No					60	No					No					No					No					No
DM10629	Enrollment	Yes	Rural	Nuclear	4	2	2	Yes	No		2014	No					No					No					47	No					Yes	2014-01-01			S/C	No					No					No
DM10630	Enrollment	Yes	Urban	Nuclear	6	4	2	Yes	Yes	Daily	2012	No					No					No					52	No					No					No					No					No
DM10631	Enrollment	Yes		Nuclear	4	4		Yes	No	Daily	2001	No					No					No					45	No					No					No					Yes		1996-01-01	5		No
DM10633	Enrollment	Yes	Urban	Joint	9	6	3	Yes	Yes	Daily	2009	No					No					No					49	No					No					No					No					No
DM10634	Enrollment	Yes	Urban	Nuclear	2	2		No	No		2011	No					No					No					60	No					No					No					Yes	2006-01-01		5		No
DM10635	Enrollment	Yes	Urban		9	5	4	Yes		Daily	2013	No					No					No					50	No					No					No					Yes	2014-01-01				No
DM10636	Enrollment	Yes	Urban	Joint	8	6	2	Yes		Daily	2014	No					No					No					59	No					No					No					Yes	2015-01-01				No
DM10638	Enrollment	Yes	Urban	Nuclear	3	2	1	No			2012	No					No					No					36	No					No					No					No					No
DM10639	Enrollment	Yes	Urban	Joint	10	8	2	Yes			2010	No					No					No					35	No					No					No					No					No
DM10640	Enrollment	Yes	Urban	Joint	6	4	2	Yes	No		2013	No					No					No					61	No					No					No					No					No
DM10641	Enrollment	Yes	Rural	Nuclear	5	3	2	No	No		2014	No					No					No					45	No					No					No					No					No
DM10642	Enrollment	Yes	Urban	Nuclear	4	3	1	Yes	No		2003	No					No					No					59	No					No					No					Yes	2003-01-01		5	ORAL	No
DM10643	Enrollment	Yes	Urban	Joint	8	6	2	No	No	Other	1995	No					No					No					60	No					Yes	2007-01-01				No					Yes	2007-01-01			ORAL	No
DM10644	Enrollment	Yes	Urban	Nuclear	2	2		No			2013	No					No					No					66	No					No					No					Yes	2015-07-17		5	ORAL	No
DM10645	Enrollment	Yes	Urban	Joint	5	3	2	Yes	Yes	Daily	2012	No					No					No					38	No					No					No					Yes	2013-01-01		5	ORAL	No
DM10646	Enrollment	Yes	Urban	Joint	5	4	1	Yes	Yes	Daily	2001	No					No					No					59	No					No					No					Yes	2001-01-01		5	ORAL	No
DM10647	Enrollment	Yes	Rural	Joint	5	3	2		Yes	Daily	2003	No					No					No					62	No					No					No					No					No
DM10648	Enrollment	Yes	Urban	Joint	4	4		Yes	No		2014	No					No					No					48	No					No					No					No					No
DM10649	Enrollment	Yes	Urban	Joint	8	6	2	Yes	No	Daily	2000	No					No					No					52	No					No					No					No					No
DM10650	Enrollment	Yes	Urban	Nuclear	4	4		Yes	No		2006	No					No					No					60	No					No					No					No					No
DM10651	Enrollment	Yes	Urban	Nuclear	11	5	6	No			2008	No					No					No					65	No					No					No					No					No
DM10652	Enrollment	Yes	Rural	Nuclear	1	1		No			2013	No					No					No					65	No					No					No					No					No
DM10653	Enrollment	Yes	Urban	Joint	6	4	2	No			2005	No					No					No					52	No					No					No					No					No
DM10654	Enrollment	Yes	Urban	Nuclear	5	3	2	Yes	No		1998	No					No					No					50	No					No					No					No					No
DM10655	Enrollment	Yes	Rural	Joint	10	6	4	Yes	No	Other	2015	No					No					No					60	No					No					No					No					No
DM10656	Enrollment	Yes	Rural	Nuclear	5	3	2	Yes	No		2001	No					No					No					60	No					No					No					Yes	2001-01-01		5	ORAL	No
DM10657	Enrollment	Yes	Urban	Nuclear	6	4	2	Yes	No			No					No					No					62	No					No					No					Yes	2007-01-01		5		No
DM10659	Enrollment	Yes	Rural	Nuclear	5	4	1	Yes	No	Daily	2000	No					No					No					74	No					No					No					Yes	2000-01-01		5	ORAL	No
DM10660	Enrollment	Yes	Urban	Nuclear	3	2	1	Yes	No	Daily	2013	No					No					No					37	No					No					No					No					No
DM10661	Enrollment	Yes	Urban	Joint	4	4	0	Yes	No	Daily	2009	No					No					No					56	No					No					No					No					No
DM10662	Enrollment	Yes	Urban	Nuclear	1	1		Yes	No	Daily	2010	No					No					No					65	No					No					No					No					No
DM10663	Enrollment	Yes	Urban	Joint	5	3	2	Yes	No	Daily	2010	No					No					No					50	No					No					No					No					No
DM10664	Enrollment	Yes	Urban	Joint	5	3	2	Yes	No	Daily	2014	No					No					No					52	No					No					No					No					No
DM10665	Enrollment	Yes	Urban	Nuclear	4	3	1	Yes	No		2015	No					No					No					60	No					No					No					No					No
DM10666	Enrollment	Yes	Rural	Nuclear	6	5	1	No	No		2009	No					No					No					65	No					No					No					No					No
DM10667	Enrollment	Yes	Urban	Nuclear	2	2	0	Yes	No	Daily	1997	No					No					No					59	No					No					No					No					No
DM10668	Enrollment	Yes	Urban	Joint	7	5	2	Yes	No		2008	No					No					No					65	No					No					No					No					No
DM10669	Enrollment	Yes	Rural	Nuclear	5	3	2	Yes	No			No					No					No					60	No					No					No					No					No
DM10670	Enrollment	Yes	Urban	Nuclear	6	4	2	Yes	No		2015	No					No					No					47	No					Yes	2015-12-17		16	SC	No					No					No
DM10671	Enrollment	Yes	Urban		3	3		Yes	No		2007	No					No					No					58	No					No					No					No					No
DM10672	Enrollment	Yes	Urban	Nuclear	5	2	3	Yes	Yes	Daily	2014	No					No					No					39	No					No					No					No					No
DM10673	Enrollment
DM10675	Enrollment	Yes	Urban	Nuclear	5	3	2	Yes	No		2010	No					No					No					72	No					No					No					No					No
DM10676	Enrollment	Yes	Urban	Joint	5	2	3	Yes	No	Daily	2013	No					No					No					46	No					No					No					Yes	2013-01-01		5	ORAL	No
DM10677	Enrollment	Yes	Urban	Joint	6	5	1	Yes	Yes	Daily	2014	No					No					No					58	No					No					No					No					No
DM10758	Enrollment	Yes	Urban	Joint	4	3	1	Yes	No	Daily	2005	No					No					No					55	No					No					No					No					No
DM14061	Enrollment	Yes	Urban	Joint	9	6	3	No			2012	No					No					No					45	No					No					No					No					No
DN10658	Enrollment	Yes	Rural	Nuclear	5	3	2	Yes	No		2010	No					No					No					65	No					No					No					No					No
[truncated: 165 more columns]
